# Supplementary material for: Antioxidant, hemostatic, and injectable hydrogels with photothermal antibacterial activity to accelerate full-thickness wound regeneration
Source: Royal Society of Chemistry journal article supplement (doi:10.1039/d3nj05871a), 2024-01-01
Supplement: d3nj05871a1.pdf [file d3nj05871a1.pdf]

## Antioxidant, hemostatic and injectable hydrogels with photothermal antibacterial activity to accelerate full-thickness wound regeneration

Vajihe Alinezhad<sup>a</sup>, Reza Ghadosi<sup>b</sup>, Hadi Bagheri<sup>c</sup>, Farzaneh Mahmoudi Beram<sup>d</sup>, Habib Zeigami<sup>e</sup>, Ali Kalantari-Hesarif<sup>f</sup>, Ebrahim

Mostafavi<sup>g,h</sup>, Zainab Ahmadian<sup>i</sup>, Mohammad-Ali Shahbazi<sup>j,k\*</sup>, Aziz Maleki<sup>l,a\*</sup>

<sup>h</sup> Department of Medicine, <sup>a</sup>Department of Pharmaceutical Nanotechnology, School of Pharmacy, Zanjan University of Medical Sciences, 45139-56184 Zanjan, Iran

<sup>b</sup>Department of Chemical and Petrochemical Engineering, Sharif University of Technology, Tehran, Iran

<sup>c</sup> Student Research Committee, School of Pharmacy, Zanjan University of Medical Sciences, Zanjan, Iran

<sup>d</sup>Department of Chemistry, Faculty of Chemistry, Isfahan University, Isfahan, Iran;

<sup>e</sup> Department of Microbiology, School of Medicine, Zanjan University of Medical Sciences, Zanjan, Iran

<sup>f</sup>Department of Pathobiology, Faculty of Veterinary Science, Bu-Ali Sina University, Hamadan, Iran

<sup>g</sup>Stanford Cardiovascular Institute, Stanford University School of Medicine, Stanford, CA, 94305, USA

Stanford University School of Medicine, Stanford, CA, 94305, USA

<sup>i</sup> Department of Pharmaceutics, School of Pharmacy, Lorestan University of Medical Sciences, Khorramabad, Iran

<sup>j</sup> Department of Biomedical Engineering, University Medical Center Groningen, University of Groningen, Antonius Deusinglaan 1, Groningen 9713 AV, The Netherlands

<sup>k</sup> W.J. Kolff Institute for Biomedical Engineering and Materials Science, University of Groningen, University Medical Center Groningen, Antonius Deusinglaan 1, Groningen 9713 AV, The Netherlands

\* Corresponding author: Email, [m.a.shahbazi@umcg.nl](mailto:m.a.shahbazi@umcg.nl)

<sup>l</sup> Zanjan Pharmaceutical Nanotechnology Research Center (ZPNRC), Zanjan, Iran

\* Corresponding author: Email, [Maleki@zums.ac.ir](mailto:Maleki@zums.ac.ir)

**KEYWORD:** Injectable hydrogel, wound healing, polydopamine, antibacterial, antioxidant, photothermal therapy

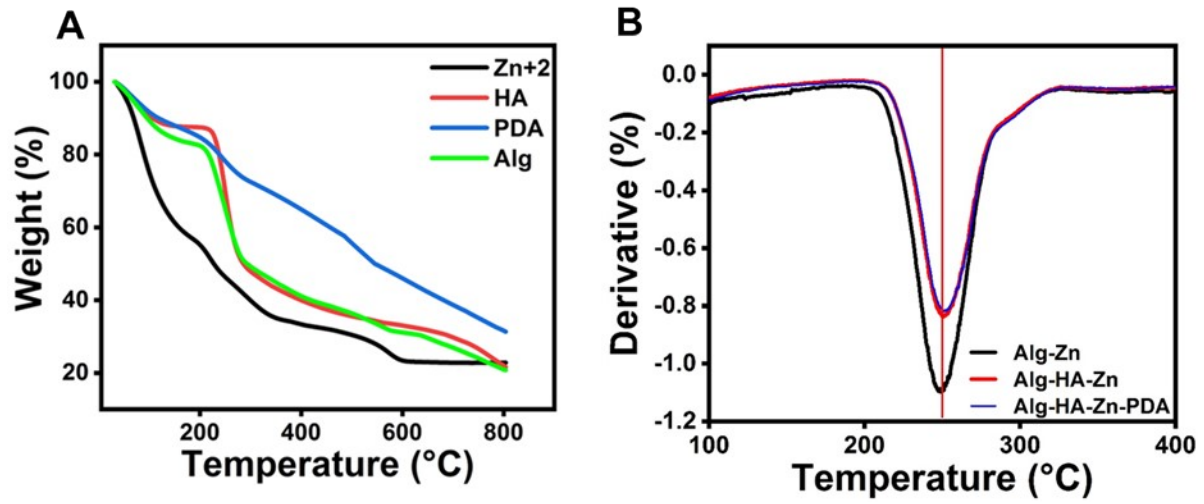

**Figure S1.** A) TGA analysis of Alg, HA, Zn, PDA, Alg-Zn, Alg-HA-Zn, and Alg-HA-Zn-PDA. B) Differential thermal analysis of Alg-Zn, Alg-HA-Zn, and Alg-HA-Zn-PDA.

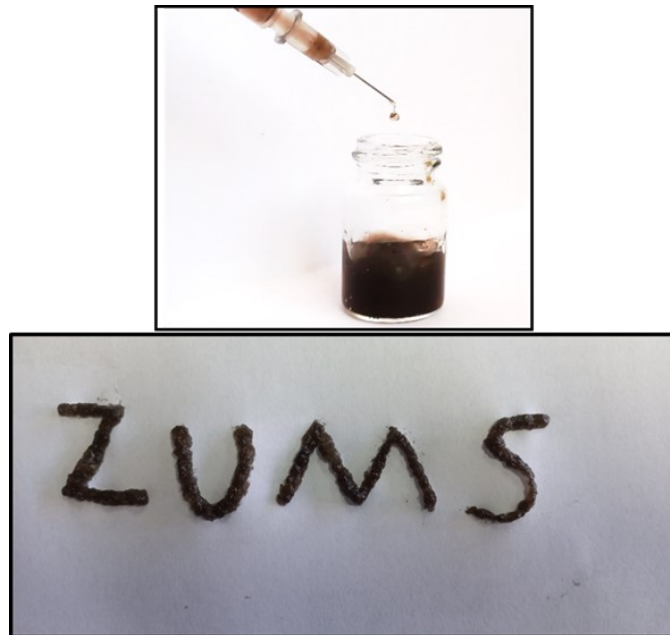

**Figure S2.** Injectability of Alg-HA-Zn-PDA hydrogel

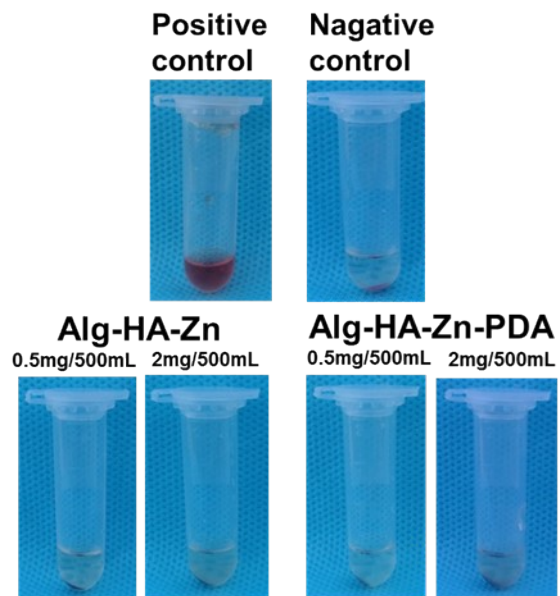

**Figure S3.** Hemolysis photographs of H<sub>2</sub>O, PBS, Alg-HA-Zn, and Alg-HA-Zn-PDA

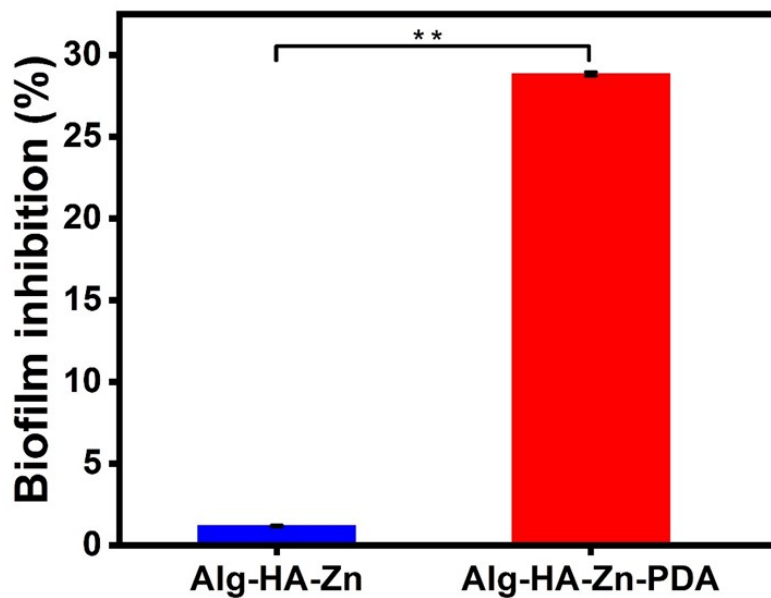

**Figure S4.** Biofilm inhibition (%) of Alg-HA-Zn and Alg-HA-Zn-PDA hydrogels with and without NIR irradiation (808 nm, 1.5 w/cm<sup>2</sup>).
